# Supplementary material for: Voltammetric analysis of naringenin at a disposable pencil graphite electrode – application to polyphenol content determination in citrus juice
Source: Royal Society of Chemistry journal article supplement (doi:10.1039/c8ay02281j), 2018-01-01
Supplement: c8ay02281j1.pdf [file c8ay02281j1.pdf]

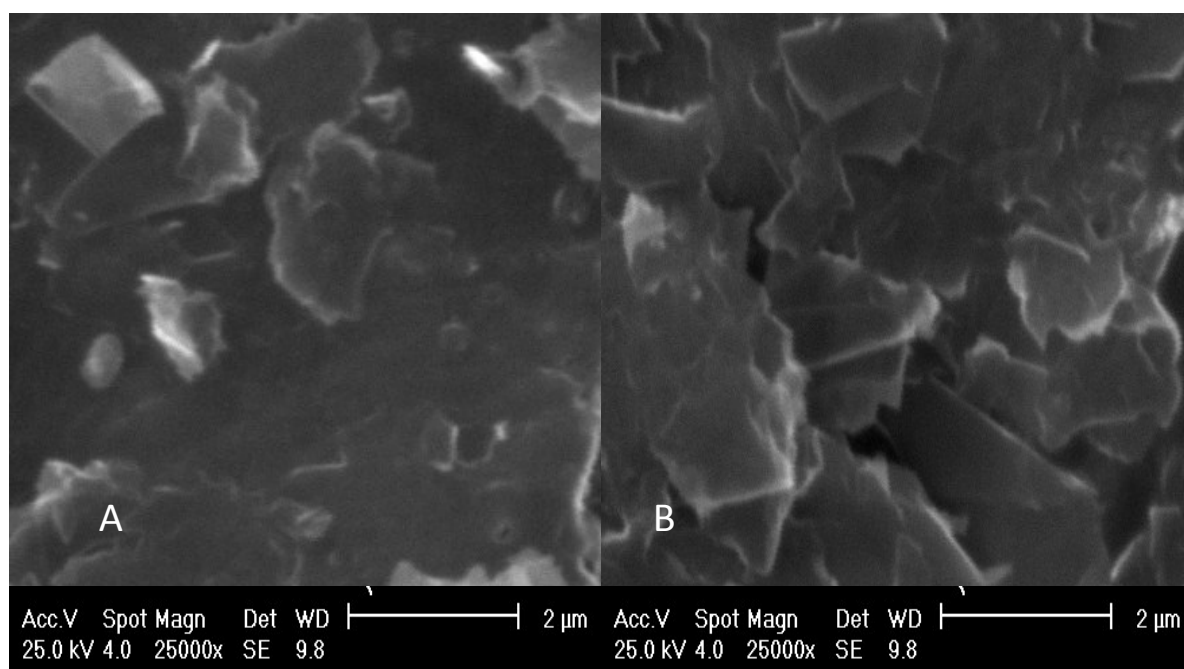

Scanning electron micrograph images for unmodified PGE (A) and electroactivated PGE (B).

Elemental peak area measured in SEM.

| Unmodified PGE |           | Electroactivated PGE |           |
|----------------|-----------|----------------------|-----------|
| Element        | Net Inte. | Element              | Net Inte. |
| C K            | 363.4     | C K                  | 305.11    |
| O K            | 4.23      | O K                  | 6.26      |
| MgK            | 5.04      | NaK                  | 10.1      |
| AlK            | 7.46      | MgK                  | 4.09      |
| S K            | 10.07     | AlK                  | 6.17      |
|                |           | P K                  | 14.64     |
|                |           | S K                  | 6.5       |
|                |           | K K                  | 3.52      |

Scanning Electron Microscopy (SEM) experiments were performed using a Hitachi S2600N Scanning Electron Microscope with EDAX probe, an accelerating voltage of 25 kV with 4 nm resolution, using different magnifying domains.

The oxygen area augmentation, considering oxygen net peak area, is about 33%.

Using a  $[\text{Fe}(\text{CN})_6]^{3-/4-}$  redox probe, based on Randles-Sevcik (and Cottrell) equations, it was noticed that the active area of PGE electroactivated increased about 32.2% from 14.71 mm<sup>2</sup> (active area of PGE unmodified) to 18.59 mm<sup>2</sup> (active area of PGE electroactivated). It should be mentioned that geometrical area of PGE, calculated as  $A = (\pi r^2) + 2\pi r h$  is 15.89 mm<sup>2</sup> ( $r=0.25$  mm;  $h=10$  mm;  $h$ =immersed region).
